# Supplementary material
Source: PubMed Central journal article supplement (PMC3961532)

**Supplementary Information:****Figure Legends****Figure S1. Characterization of soluble SECTM1 over-expressing melanoma cell lines.**

Supernatants from phCMV3 and sSECTM1 over-expressing C8161 cells were concentrated 20-fold. Equal amounts of proteins from concentrated media (lower panel) and whole cell extracts (upper panel) were loaded and analyzed by Western Blot using the rabbit anti-human SECTM1 antibody. Vinculin was used as a loading control.

**Figure S2. Expression of CD7 in melanocytes and melanoma cell lines.** Cell lysates from melanocytes and melanoma cell lines were loaded and analyzed by Western Blot using a rabbit monoclonal anti-CD7 antibody. HSP90 was used as a loading control.

**Figure S3. SECTM1 is induced by MG132.** 1205Lu cells were stimulated with indicated dose (a) and times (b). Cell lysates were loaded and analyzed by Western Blot using the rabbit anti-SECTM1 antibody. HSP was used as a loading control.

**Figure S4. SECTM1 is not expressed in normal skin tissues.** Co-staining of SECTM1 (green) and a melanocyte marker HMB45 (red) in two normal human skin tissues. Data are representative of 6 normal skin tissues. Scale bar = 100  $\mu\text{m}$ .

**Figure S5. Expression of SECTM1 is accompanied by immune cell infiltration.** Melanoma (a) and Breast Cancer tissues (b) were stained with anti-SECTM1 antibodies. Arrows indicate immune cell infiltrating areas. Scale bar = 50  $\mu\text{m}$ .

Figure S1

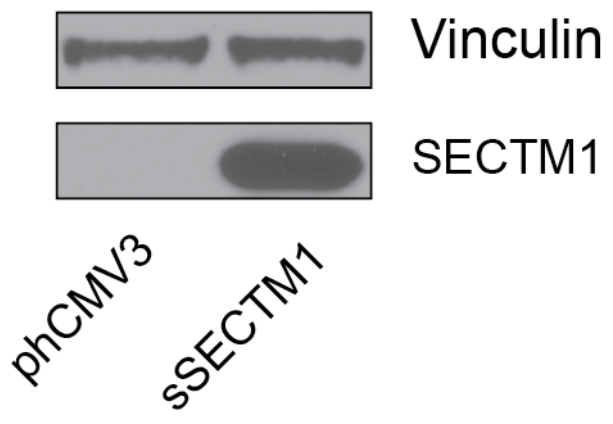

Figure S2

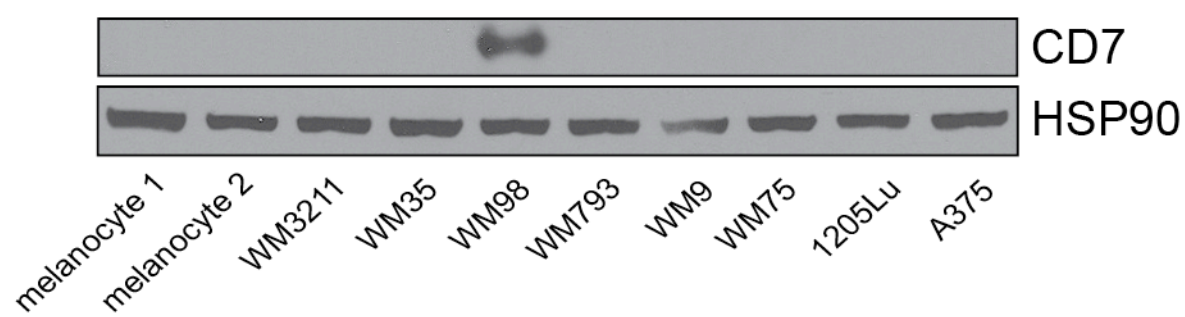

Figure S3

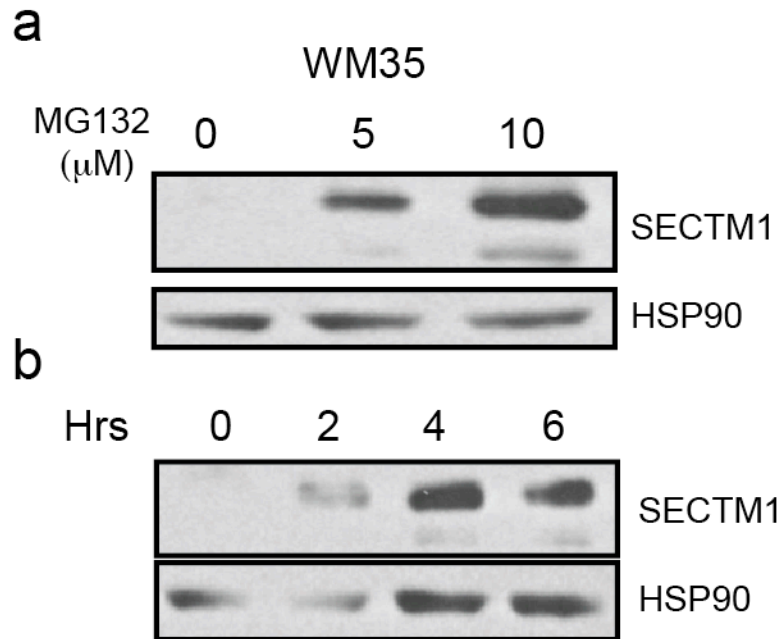

Figure S4

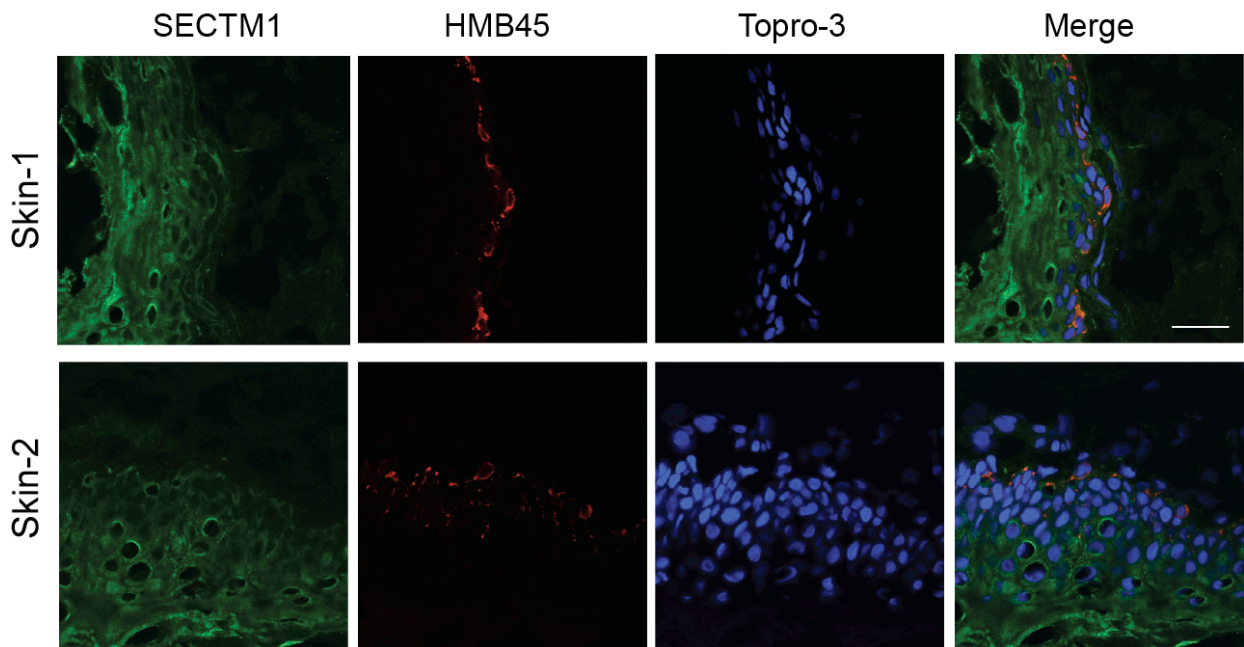

# Figure S5

**a**

Primary Melanoma 1

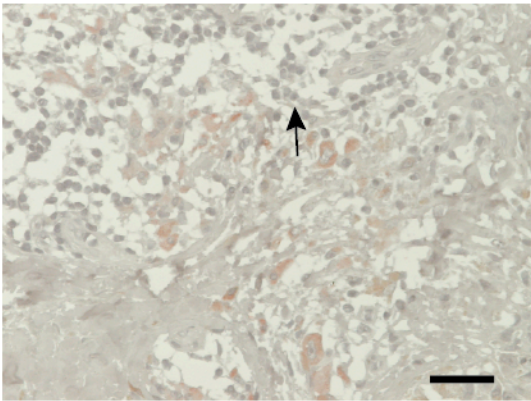

Primary Melanoma 2

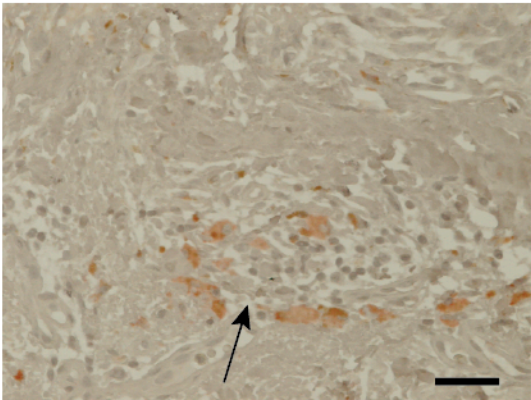

**b**

Breast Cancer 1

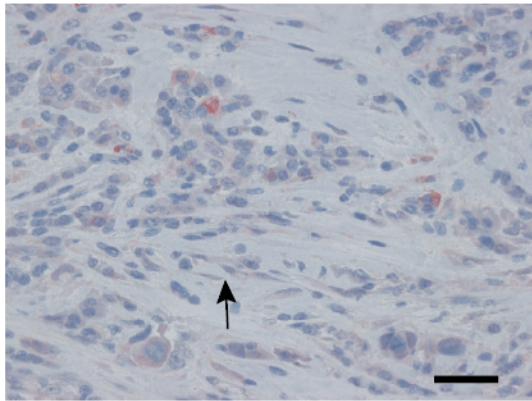

Breast Cancer 2

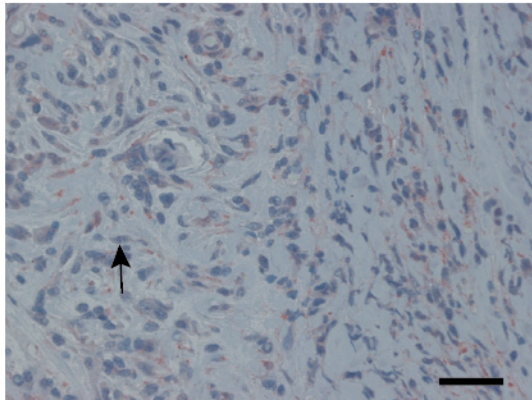

Supplement: NIHMS533701-supplement-01.pdf [file NIHMS533701-supplement-01.pdf]
